# Supplementary material
Source: PubMed Central journal article supplement (PMC4979613)
Supplement: NIHMS803281-supplement-Supplemental_Figure_1.pdf [file NIHMS803281-supplement-Supplemental_Figure_1.pdf]

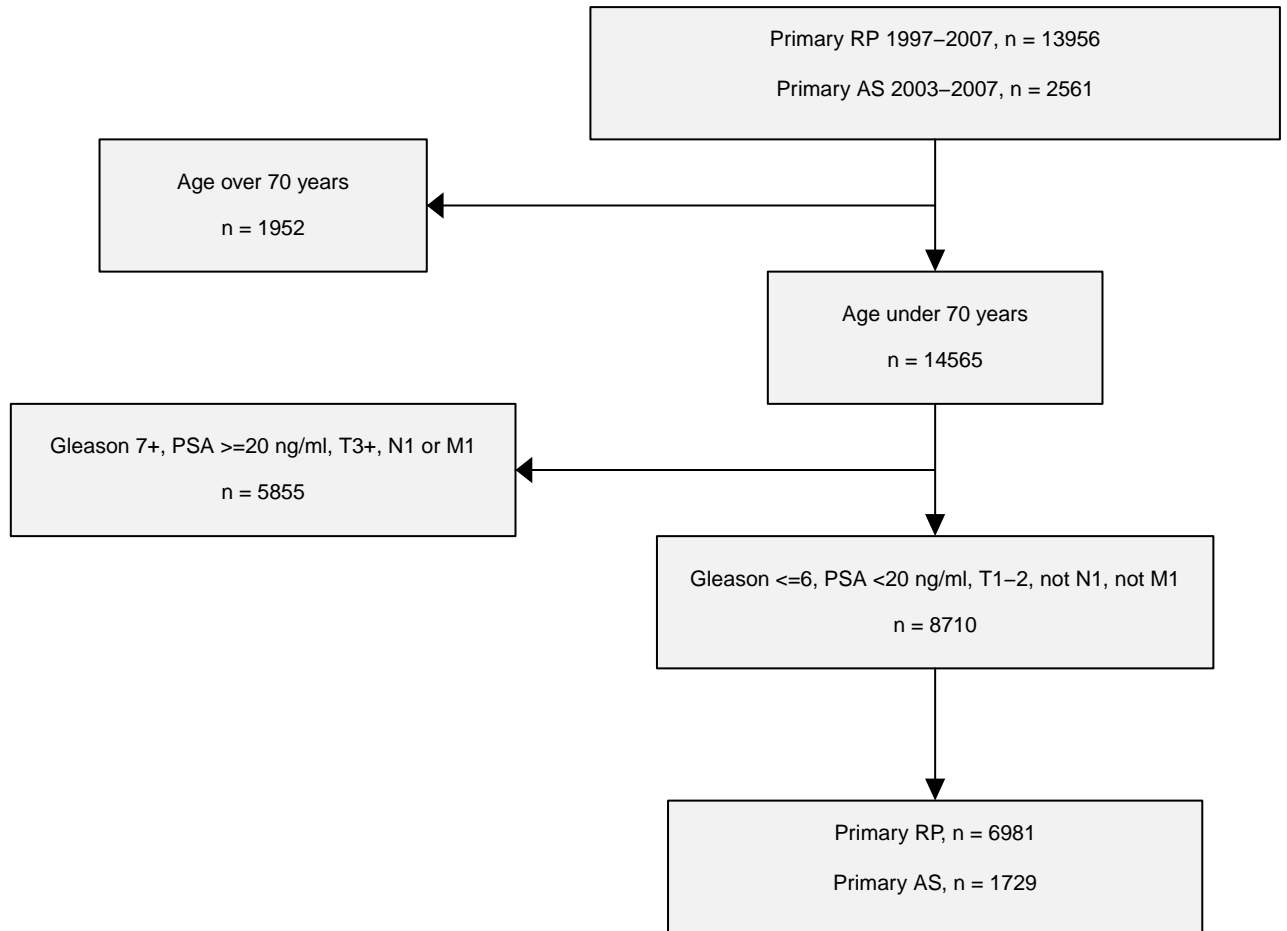

\*Before 2003 active surveillance and watchful waiting was reported as "conservative management", thus only men diagnosed after 2003 can be identified as on AS. Therefore the follow-up of the full "intent-to-treat" study group is limited to seven years whereas for the delayed versus immediate prostatectomy analysis, data were available from 1997 and a follow-up of ten years is reported.
