# Supplementary material
Source: PubMed Central journal article supplement (PMC4979613)
Supplement: NIHMS803281-supplement-Supplemental_Figure_3.pdf [file NIHMS803281-supplement-Supplemental_Figure_3.pdf]

## Salvage RT

## PCa-specific death

HR

95% CI

HR

95% CI

## Time to RP (no. of events)

&lt;1 yr (720/46)

1.00 ( Ref. )

●

1.00 ( Ref. )

●

1–2 yrs (47/5)

1.32 (0.98–1.78)

●

2.24 (0.88–5.74)

●

2–7 yrs (37/3)

1.91 (1.37–2.68)

●

2.29 (0.70–7.56)

●

## Serum PSA

1.12 (1.08–1.16)

●

1.18 (1.03–1.36)

●

## Clinical stage

T1

1.00 ( Ref. )

●

1.00 ( Ref. )

●

T2

1.34 (1.16–1.55)

●

2.48 (1.42–4.32)

●

## Comorbidity

CCI 0

1.00 ( Ref. )

●

1.00 ( Ref. )

●

CCI 1

0.80 (0.59–1.09)

●

1.59 (0.68–3.75)

●

CCI 2+

0.67 (0.44–1.03)

●

0.41 (0.06–2.99)

●

## Marital status

Married

1.00 ( Ref. )

●

1.00 ( Ref. )

●

Separated/Divorced/Widower

0.95 (0.79–1.16)

●

1.11 (0.55–2.22)

●

Single

1.01 (0.78–1.29)

●

0.56 (0.13–2.32)

●

## Educational level

High

1.00 ( Ref. )

●

1.00 ( Ref. )

●

Middle

1.28 (1.08–1.51)

●

1.44 (0.68–3.06)

●

Low

1.08 (0.89–1.31)

●

1.80 (0.84–3.82)

●

## Type of hospital

Non-university hospital

1.00 ( Ref. )

●

1.00 ( Ref. )

●

University hospital

1.04 (0.90–1.19)

●

0.87 (0.50–1.51)

●

0 1 2 3

0 1 2 3
