# Supplementary material
Source: PubMed Central journal article supplement (PMC4979613)

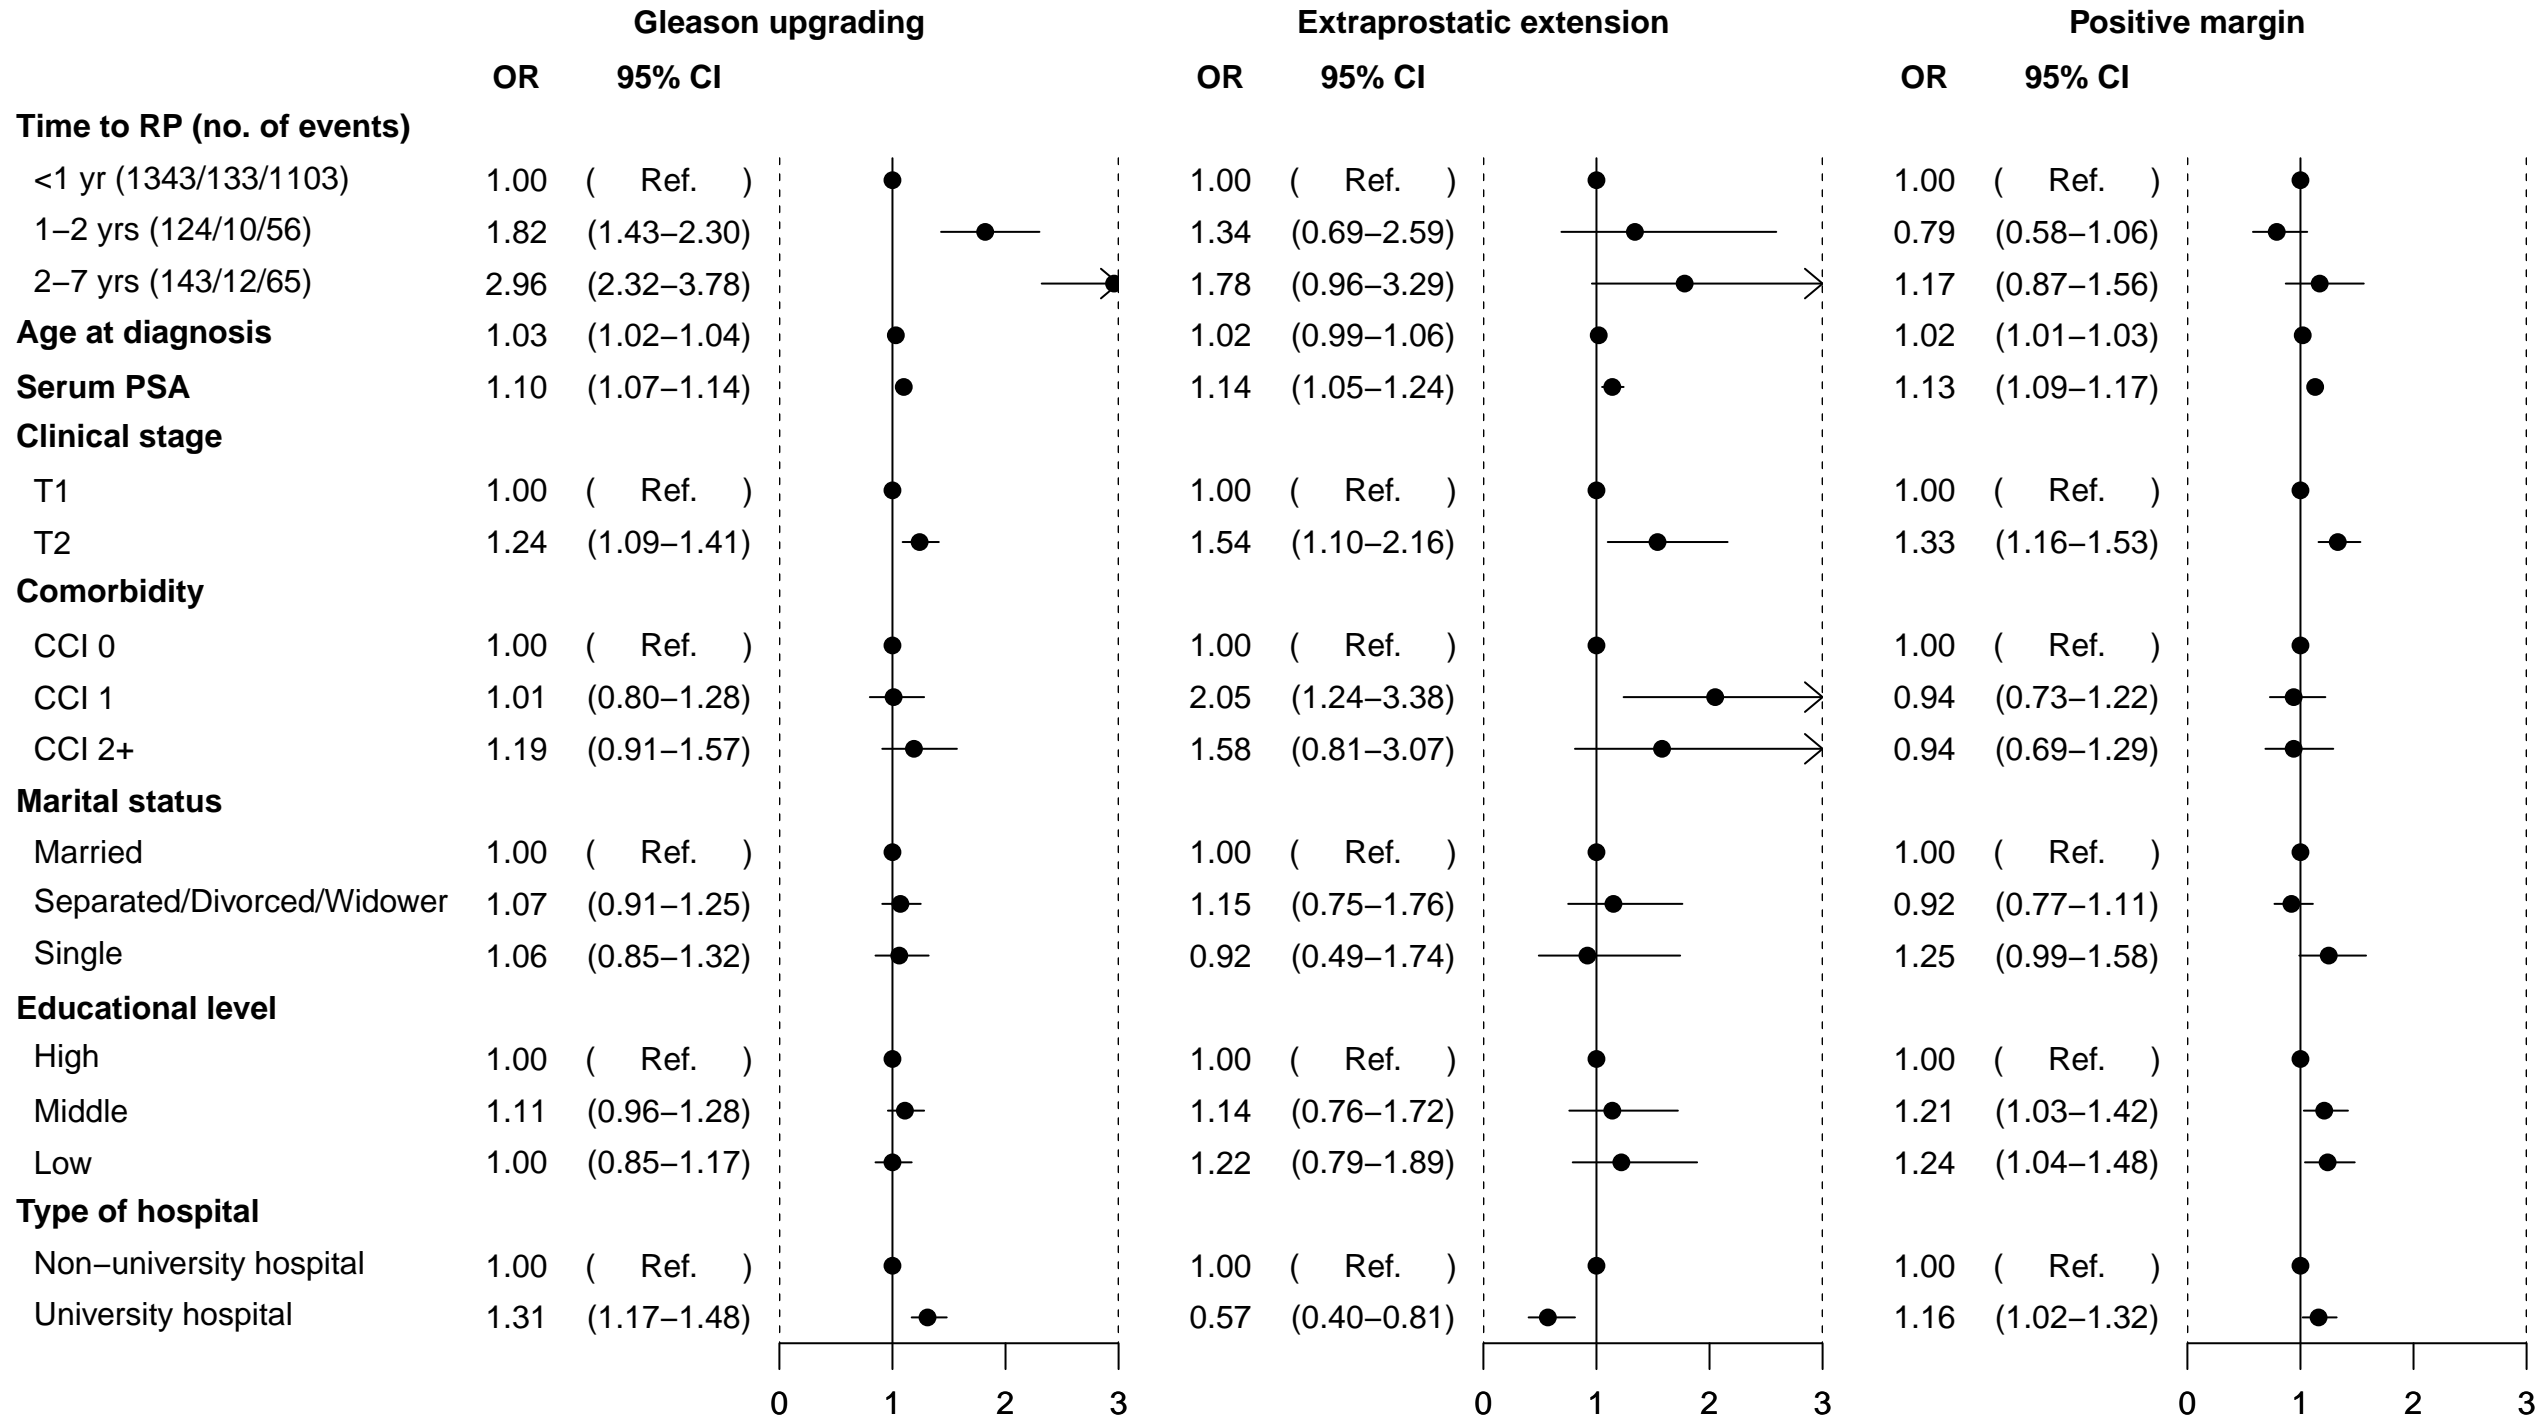

Supplement: NIHMS803281-supplement-Supplemental_Figure_2.pdf [file NIHMS803281-supplement-Supplemental_Figure_2.pdf]
